# Supplementary material for: Platelets from patients with myocardial infarction can activate T cells
Source: PubMed Central journal article supplement — Haematologica. 2020 Feb 27;106(1):288–90. doi: 10.3324/haematol.2019.243402 (PMC7776330; doi:10.3324/haematol.2019.243402), 2020-02-27
Supplement: 2019_243402-Disclosures_Contributions.pdf [file 2019_243402-Disclosures_Contributions.pdf]

Haematologica  
HAEMATOL/2019/243402  
Version 3

Platelets from patients with myocardial infarction can activate T cells

Elena E. Solomou, Katerina Katsanaki, Elena Kalyvioti, Vasilios Gizas, Angelos Perperis, Dora Babali, Evgenia Verigou, Haralambos Gogos, George Hahalis, Periklis Davlourous, and Dimitrios Alexopoulos

Disclosures: None

Contributions: EES designed research, performed experiments, analyzed data and wrote the paper. K.K and E.K. analyzed data and performed experiments, V.G., A.P, and D.B. performed experiments, E.V. analyzed data, H.G, G.H., and P.D., analyzed data, D.A. analyzed data and wrote the paper.
